# Supplementary material for: Competitive adsorption of VOCs from binary aqueous mixtures on zeolite ZSM-5
Source: Royal Society of Chemistry journal article supplement (doi:10.1039/c6ra08872d), 2016-01-01
Supplement: c6ra08872d1.pdf [file c6ra08872d1.pdf]

## Supplementary Information

### Competitive Adsorption of VOCs from binary aqueous mixtures on zeolite

#### ZSM-5

L. Pasti,<sup>a\*\*</sup> E. Rodeghero<sup>b</sup>, E. Sarti<sup>a</sup>, V. Bosi<sup>a</sup>, A. Cavazzini<sup>a</sup>, R. Bagatin<sup>c</sup>, and A. Martucci<sup>b\*</sup>

---

<sup>a</sup>Department of Chemistry and Pharmaceutical Sciences, University of Ferrara, Via L. Borsari 46, I-44123 Ferrara (FE), Italy

<sup>b</sup>Department of Physics and Earth Sciences, University of Ferrara, Via Saragat 1, I-44123 Ferrara (FE), Italy.

<sup>c</sup>Research Center for Non-Conventional Energy – Istituto Eni Donegani Environmental Technologies, via Maritano, 26, San Donato Milanese (MI), I-20097, Italy.

\* Corresponding Author

\*\* Corresponding Author

Figure S1: ZSM-5 diffraction peak positions after binary mixture (DCE-MTBE, TOL-MTBE) adsorption in the 2.0-7.7° 2θ regions.

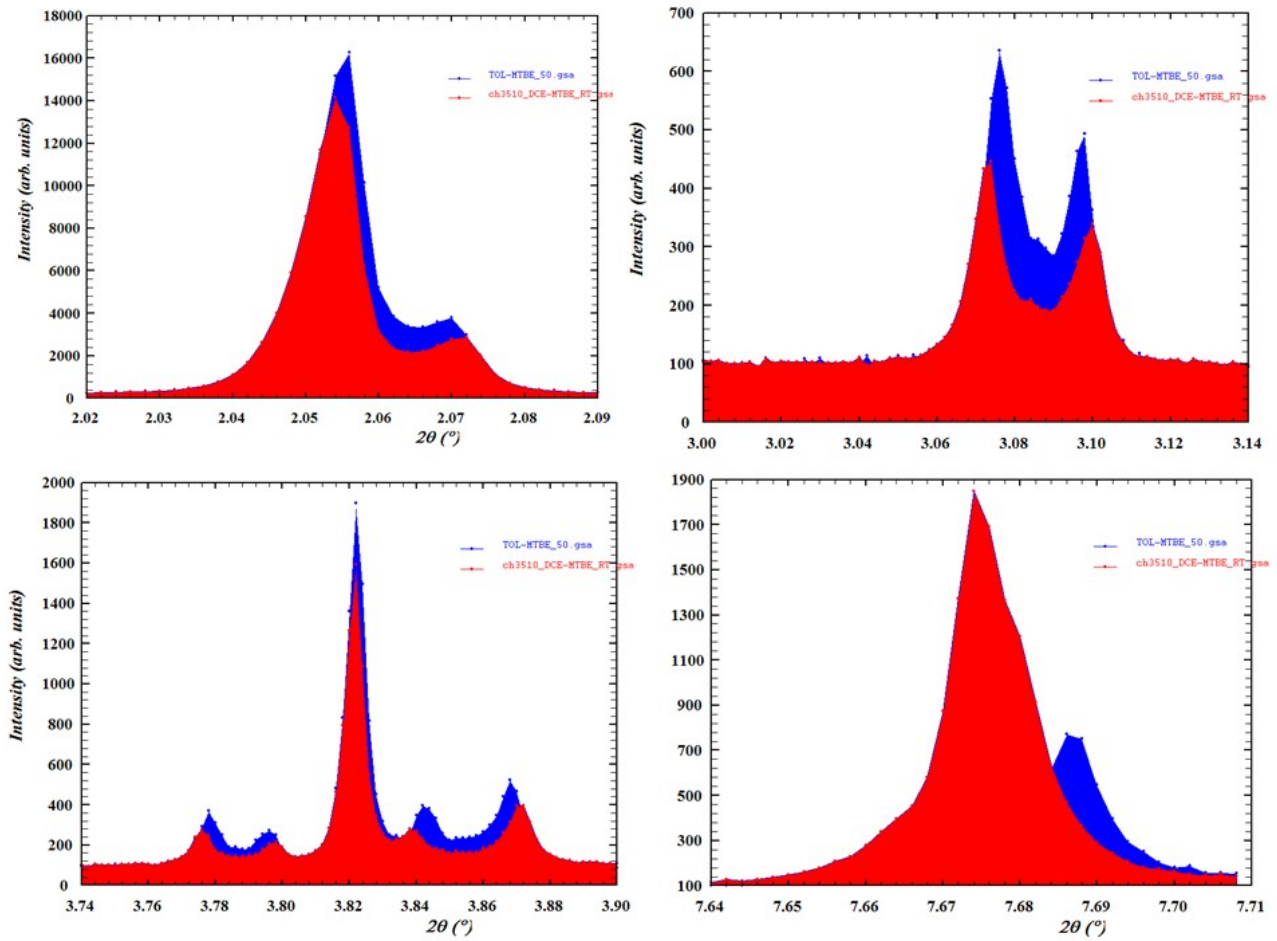

**Figure S2.** Thermogravimetric (TG), differential thermogravimetric (DTG) and differential thermal analysis (DTA) of ZSM-5-TOL-MTBE.

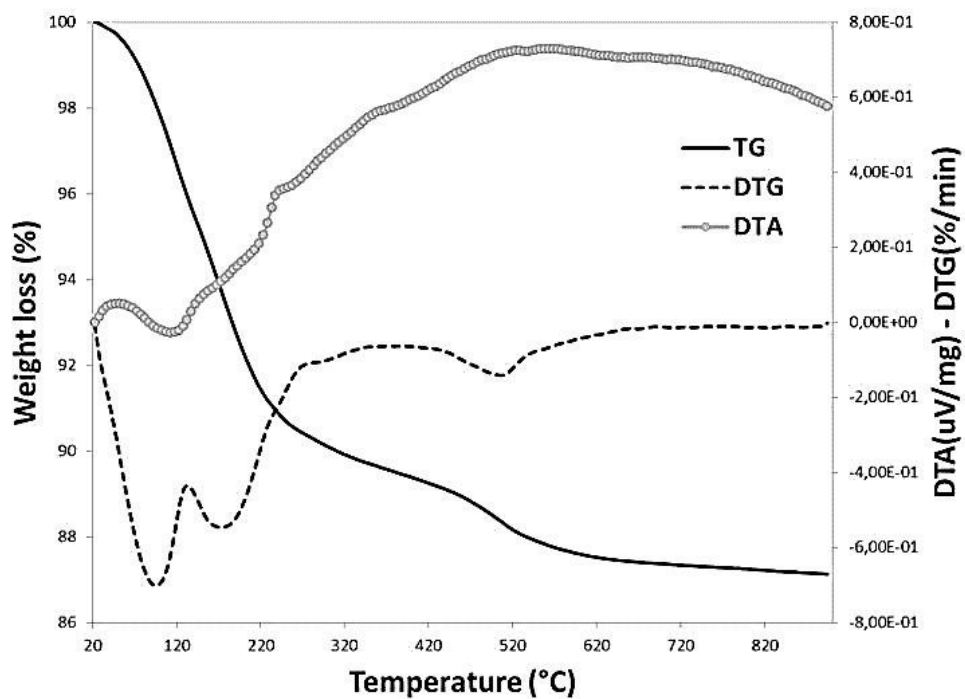

Table 1S1: Physical-chemical properties of the three investigated compounds.

| Compound | MW (g mol <sup>-1</sup> ) | logKow | Solubility in water (g L <sup>-1</sup> ) | Molecule volume (Å <sup>3</sup> ) |
|----------|---------------------------|--------|------------------------------------------|-----------------------------------|
| TOL      | 92.14                     | 2.73   | 0.47                                     | 98.87                             |
| MTBE     | 88.15                     | 1.2    | 26                                       | 105.60                            |
| DCE      | 98.95                     | 1.48   | 8.7                                      | 73.30                             |

**Table 2S1:** fractional atomic coordinates of ZSM-5 framework's atoms loaded with MTBE at Room Temperature (°C).

| ZSM-5-MTBE 30°C |              |             |              |            |          |
|-----------------|--------------|-------------|--------------|------------|----------|
|                 | x/a          | y/b         | z/c          | Uiso       | Fraction |
| T1              | 0.05422(24)  | 0.42299(20) | -0.32853(38) | 0.0042(9)  | 1        |
| T2              | 0.03289(24)  | 0.31648(24) | -0.16757(38) | 0.0042(9)  | 1        |
| T3              | 0.06535(21)  | 0.28079(22) | 0.04463(42)  | 0.0042(9)  | 1        |
| T4              | 0.06465(25)  | 0.12496(22) | 0.03471(35)  | 0.0042(9)  | 1        |
| T5              | 0.02811(23)  | 0.07270(24) | -0.17287(40) | 0.0042(9)  | 1        |
| T6              | 0.05738(21)  | 0.19424(23) | -0.30775(32) | 0.0042(9)  | 1        |
| T7              | -0.17116(22) | 0.42583(22) | -0.32245(39) | 0.0042(9)  | 1        |
| T8              | -0.12479(24) | 0.31179(24) | -0.17574(39) | 0.0042(9)  | 1        |
| T9              | -0.17543(24) | 0.26949(24) | 0.03311(42)  | 0.0042(9)  | 1        |
| T10             | -0.17825(23) | 0.11428(23) | 0.03045(44)  | 0.0042(9)  | 1        |
| T11             | -0.12891(24) | 0.06690(25) | -0.17525(45) | 0.0042(9)  | 1        |
| T12             | -0.16457(24) | 0.18877(23) | -0.30996(35) | 0.0042(9)  | 1        |
| T13             | 0.44273(23)  | 0.42431(22) | -0.33351(34) | 0.0042(9)  | 1        |
| T14             | 0.47104(18)  | 0.31072(23) | -0.18160(33) | 0.0042(9)  | 1        |
| T15             | 0.43780(15)  | 0.27990(21) | 0.03490(24)  | 0.0042(9)  | 1        |
| T16             | 0.43301(25)  | 0.12309(21) | 0.03032(36)  | 0.0042(9)  | 1        |
| T17             | 0.47292(24)  | 0.07354(23) | -0.18408(42) | 0.0042(9)  | 1        |
| T18             | 0.44110(22)  | 0.18896(21) | -0.31945(37) | 0.0042(9)  | 1        |
| T19             | 0.67263(21)  | 0.42165(23) | -0.31214(36) | 0.0042(9)  | 1        |
| T20             | 0.63190(22)  | 0.31124(25) | -0.16729(33) | 0.0042(9)  | 1        |
| T21             | 0.66960(23)  | 0.27186(26) | 0.04872(40)  | 0.0042(9)  | 1        |
| T22             | 0.67089(24)  | 0.11689(25) | 0.03547(42)  | 0.0042(9)  | 1        |
| T23             | 0.63030(25)  | 0.07300(27) | -0.18315(42) | 0.0042(9)  | 1        |
| T24             | 0.67949(26)  | 0.19301(25) | -0.30059(32) | 0.0042(9)  | 1        |
| O1              | 0.06146(38)  | 0.37608(32) | -0.23321(54) | 0.0065(18) | 1        |
| O2              | 0.06726(31)  | 0.31902(29) | -0.05965(31) | 0.0065(18) | 1        |
| O3              | 0.05498(38)  | 0.20338(18) | 0.02473(74)  | 0.0065(18) | 1        |
| O4              | 0.06844(32)  | 0.09249(41) | -0.07377(35) | 0.0065(18) | 1        |
| O5              | 0.04798(39)  | 0.12189(24) | -0.26137(47) | 0.0065(18) | 1        |
| O6              | 0.05047(35)  | 0.24791(29) | -0.22068(44) | 0.0065(18) | 1        |
| O7              | -0.15563(43) | 0.37305(34) | -0.23642(59) | 0.0065(18) | 1        |
| O8              | -0.16183(39) | 0.30522(37) | -0.07123(52) | 0.0065(18) | 1        |
| O9              | -0.16226(52) | 0.19167(19) | 0.02132(75)  | 0.0065(18) | 1        |
| O10             | -0.17055(29) | 0.07977(38) | -0.07604(41) | 0.0065(18) | 1        |
| O11             | -0.15305(43) | 0.11786(29) | -0.25968(57) | 0.0065(18) | 1        |
| O12             | -0.13460(40) | 0.24524(34) | -0.23883(63) | 0.0065(18) | 1        |
| O13             | -0.04637(20) | 0.32394(34) | -0.15701(68) | 0.0065(18) | 1        |
| O14             | -0.05068(19) | 0.07744(42) | -0.15319(75) | 0.0065(18) | 1        |
| O15             | 0.12231(27)  | 0.42139(32) | -0.39012(50) | 0.0065(18) | 1        |
| O16             | -0.00610(31) | 0.39730(35) | -0.39772(64) | 0.0065(18) | 1        |
| O17             | -0.13576(28) | 0.40270(40) | -0.42322(52) | 0.0065(18) | 1        |
| O18             | 0.12970(22)  | 0.20008(44) | -0.35745(36) | 0.0065(18) | 1        |

|     |              |              |              |            |   |
|-----|--------------|--------------|--------------|------------|---|
| O19 | 0.00057(26)  | 0.20709(33)  | -0.39040(42) | 0.0065(18) | 1 |
| O20 | -0.12807(24) | 0.19087(45)  | -0.41556(42) | 0.0065(18) | 1 |
| O21 | 0.04688(41)  | -0.00138(21) | -0.20486(40) | 0.0065(18) | 1 |
| O22 | -0.14151(37) | -0.00732(23) | -0.21337(53) | 0.0065(18) | 1 |
| O23 | -0.25028(17) | 0.43040(38)  | -0.34101(49) | 0.0065(18) | 1 |
| O24 | -0.24293(21) | 0.20141(35)  | -0.32639(24) | 0.0065(18) | 1 |
| O25 | -0.25142(18) | 0.28204(53)  | 0.06530(54)  | 0.0065(18) | 1 |
| O26 | -0.25308(18) | 0.10506(50)  | 0.06956(52)  | 0.0065(18) | 1 |
| O27 | 0.44229(37)  | 0.37445(29)  | -0.24093(46) | 0.0065(18) | 1 |
| O28 | 0.45256(29)  | 0.31606(26)  | -0.06799(25) | 0.0065(18) | 1 |
| O29 | 0.43035(40)  | 0.20195(17)  | 0.01880(42)  | 0.0065(18) | 1 |
| O30 | 0.44315(49)  | 0.09043(38)  | -0.07694(45) | 0.0065(18) | 1 |
| O31 | 0.43670(39)  | 0.11796(22)  | -0.26704(59) | 0.0065(18) | 1 |
| O32 | 0.44854(34)  | 0.24521(28)  | -0.23598(42) | 0.0065(18) | 1 |
| O33 | 0.66735(28)  | 0.37392(35)  | -0.21734(50) | 0.0065(18) | 1 |
| O34 | 0.64609(41)  | 0.31062(27)  | -0.04980(28) | 0.0065(18) | 1 |
| O35 | 0.65421(49)  | 0.19438(21)  | 0.03639(79)  | 0.0065(18) | 1 |
| O36 | 0.66041(43)  | 0.08847(49)  | -0.07489(39) | 0.0065(18) | 1 |
| O37 | 0.66624(43)  | 0.11901(27)  | -0.26347(52) | 0.0065(18) | 1 |
| O38 | 0.66036(41)  | 0.24441(33)  | -0.21484(38) | 0.0065(18) | 1 |
| O39 | 0.55290(16)  | 0.31543(44)  | -0.18834(62) | 0.0065(18) | 1 |
| O40 | 0.55165(21)  | 0.08823(35)  | -0.18408(87) | 0.0065(18) | 1 |
| O41 | 0.37281(25)  | 0.41915(38)  | -0.39216(48) | 0.0065(18) | 1 |
| O42 | 0.50237(30)  | 0.40541(40)  | -0.40683(50) | 0.0065(18) | 1 |
| O43 | 0.63233(29)  | 0.39012(36)  | -0.40436(43) | 0.0065(18) | 1 |
| O44 | 0.37444(27)  | 0.20140(39)  | -0.38382(62) | 0.0065(18) | 1 |
| O45 | 0.50498(26)  | 0.19123(36)  | -0.39040(48) | 0.0065(18) | 1 |
| O46 | 0.63497(18)  | 0.20763(40)  | -0.39774(31) | 0.0065(18) | 1 |
| O47 | 0.46054(32)  | -0.00312(17) | -0.20787(47) | 0.0065(18) | 1 |
| O48 | 0.64278(38)  | -0.00319(23) | -0.20991(57) | 0.0065(18) | 1 |

**Table 3SI:** fractional atomic coordinates of ZSM-5 framework's atoms loaded with MTBE and DCE mixture at Room Temperature (°C)

| ZSM-5-DCE-MTBE -30°C |              |             |              |          |          |
|----------------------|--------------|-------------|--------------|----------|----------|
|                      | x/a          | y/b         | z/c          | Uiso     | Fraction |
| T1                   | 0.05462(19)  | 0.42182(19) | -0.32417(32) | 0.006(7) | 1        |
| T2                   | 0.03358(21)  | 0.31680(21) | -0.16631(32) | 0.006(7) | 1        |
| T3                   | 0.06290(21)  | 0.27997(19) | 0.05014(34)  | 0.006(7) | 1        |
| T4                   | 0.06256(20)  | 0.12432(18) | 0.03536(32)  | 0.006(7) | 1        |
| T5                   | 0.02814(18)  | 0.07568(22) | -0.17463(33) | 0.006(7) | 1        |
| T6                   | 0.05838(21)  | 0.19612(19) | -0.31093(35) | 0.006(1) | 1        |
| T7                   | -0.17182(17) | 0.42669(18) | -0.32289(33) | 0.006(1) | 1        |
| T8                   | -0.12432(19) | 0.31186(19) | -0.17895(32) | 0.006(1) | 1        |
| T9                   | -0.17488(18) | 0.27098(20) | 0.03161(34)  | 0.006(1) | 1        |
| T10                  | -0.17767(17) | 0.11601(20) | 0.03348(38)  | 0.006(1) | 1        |
| T11                  | -0.12918(19) | 0.06854(22) | -0.17399(36) | 0.006(1) | 1        |
| T12                  | -0.16394(19) | 0.18849(19) | -0.31393(34) | 0.006(1) | 1        |
| T13                  | 0.44311(20)  | 0.42731(20) | -0.33397(33) | 0.006(1) | 1        |
| T14                  | 0.47426(19)  | 0.31154(23) | -0.18726(34) | 0.006(1) | 1        |
| T15                  | 0.43981(21)  | 0.27906(18) | 0.03298(35)  | 0.006(1) | 1        |
| T16                  | 0.43396(21)  | 0.12298(19) | 0.03431(30)  | 0.006(1) | 1        |
| T17                  | 0.47423(19)  | 0.07325(21) | -0.18088(35) | 0.006(1) | 1        |
| T18                  | 0.43869(20)  | 0.18764(18) | -0.31803(40) | 0.006(1) | 1        |
| T19                  | 0.67165(17)  | 0.42225(19) | -0.31369(31) | 0.006(1) | 1        |
| T20                  | 0.63285(18)  | 0.31079(21) | -0.16849(32) | 0.006(1) | 1        |
| T21                  | 0.66961(19)  | 0.27306(21) | 0.04659(33)  | 0.006(1) | 1        |
| T22                  | 0.67028(18)  | 0.11838(20) | 0.03575(35)  | 0.006(1) | 1        |
| T23                  | 0.63168(20)  | 0.07382(22) | -0.18358(33) | 0.006(1) | 1        |
| T24                  | 0.68193(19)  | 0.19456(21) | -0.30117(34) | 0.006(1) | 1        |
| O1                   | 0.06357(30)  | 0.37897(27) | -0.22484(44) | 0.012(1) | 1        |
| O2                   | 0.06548(32)  | 0.31485(35) | -0.05671(29) | 0.012(1) | 1        |
| O3                   | 0.04929(32)  | 0.20250(15) | 0.03525(73)  | 0.012(1) | 1        |
| O4                   | 0.06832(26)  | 0.09826(44) | -0.07677(36) | 0.012(1) | 1        |
| O5                   | 0.04586(34)  | 0.12422(20) | -0.26487(45) | 0.012(1) | 1        |
| O6                   | 0.05209(42)  | 0.25037(26) | -0.22484(49) | 0.012(1) | 1        |
| O7                   | -0.15505(36) | 0.37405(29) | -0.23727(52) | 0.012(1) | 1        |
| O8                   | -0.16146(37) | 0.30364(32) | -0.07484(39) | 0.012(1) | 1        |
| O9                   | -0.16003(42) | 0.19320(17) | 0.02626(69)  | 0.012(1) | 1        |
| O10                  | -0.16907(24) | 0.08228(38) | -0.07342(37) | 0.012(1) | 1        |
| O11                  | -0.15419(34) | 0.11894(25) | -0.25855(49) | 0.012(1) | 1        |
| O12                  | -0.13503(37) | 0.24645(30) | -0.24445(57) | 0.012(1) | 1        |
| O13                  | -0.04598(17) | 0.32356(31) | -0.15952(70) | 0.012(1) | 1        |
| O14                  | -0.05059(14) | 0.07861(34) | -0.15426(59) | 0.012(1) | 1        |
| O15                  | 0.12190(21)  | 0.41832(30) | -0.38771(41) | 0.012(1) | 1        |
| O16                  | -0.00646(24) | 0.39279(36) | -0.38878(50) | 0.012(1) | 1        |
| O17                  | -0.13482(23) | 0.40570(33) | -0.42320(44) | 0.012(1) | 1        |

|     |              |              |              |          |   |
|-----|--------------|--------------|--------------|----------|---|
| O18 | 0.13177(19)  | 0.19907(38)  | -0.35761(30) | 0.012(1) | 1 |
| O19 | 0.00393(23)  | 0.21012(30)  | -0.39649(53) | 0.012(1) | 1 |
| O20 | -0.12433(25) | 0.18774(37)  | -0.41682(36) | 0.012(1) | 1 |
| O21 | 0.04921(34)  | 0.00192(20)  | -0.20446(37) | 0.012(1) | 1 |
| O22 | -0.14259(33) | -0.00573(20) | -0.21046(43) | 0.012(1) | 1 |
| O23 | -0.25099(13) | 0.42853(36)  | -0.34221(44) | 0.012(1) | 1 |
| O24 | -0.24183(16) | 0.20094(32)  | -0.33578(56) | 0.012(1) | 1 |
| O25 | -0.25135(15) | 0.28285(43)  | 0.06134(48)  | 0.012(1) | 1 |
| O26 | -0.25339(13) | 0.10761(42)  | 0.06945(46)  | 0.012(1) | 1 |
| O27 | 0.44857(37)  | 0.37736(26)  | -0.24185(47) | 0.012(1) | 1 |
| O28 | 0.45227(40)  | 0.31265(31)  | -0.07304(36) | 0.012(1) | 1 |
| O29 | 0.42720(32)  | 0.20132(16)  | 0.01904(62)  | 0.012(1) | 1 |
| O30 | 0.44949(40)  | 0.08892(38)  | -0.07047(40) | 0.012(1) | 1 |
| O31 | 0.43466(27)  | 0.11913(23)  | -0.25858(57) | 0.012(1) | 1 |
| O32 | 0.44255(32)  | 0.24795(27)  | -0.24090(62) | 0.012(1) | 1 |
| O33 | 0.66423(34)  | 0.37579(29)  | -0.21788(41) | 0.012(1) | 1 |
| O34 | 0.64481(33)  | 0.31237(28)  | -0.05051(28) | 0.012(1) | 1 |
| O35 | 0.65343(40)  | 0.19587(17)  | 0.03391(68)  | 0.012(1) | 1 |
| O36 | 0.65915(36)  | 0.08833(39)  | -0.07342(32) | 0.012(1) | 1 |
| O37 | 0.66883(30)  | 0.12111(24)  | -0.26109(45) | 0.012(1) | 1 |
| O38 | 0.66833(41)  | 0.24654(30)  | -0.21375(44) | 0.012(1) | 1 |
| O39 | 0.55429(16)  | 0.30793(47)  | -0.19265(57) | 0.012(1) | 1 |
| O40 | 0.55286(17)  | 0.08771(29)  | -0.18824(66) | 0.012(1) | 1 |
| O41 | 0.37183(19)  | 0.41868(32)  | -0.38797(43) | 0.012(1) | 1 |
| O42 | 0.50143(23)  | 0.41202(34)  | -0.41144(51) | 0.012(1) | 1 |
| O43 | 0.63065(23)  | 0.39101(30)  | -0.40527(37) | 0.012(1) | 1 |
| O44 | 0.37331(27)  | 0.19559(36)  | -0.38694(53) | 0.012(1) | 1 |
| O45 | 0.50399(26)  | 0.18802(38)  | -0.38606(45) | 0.012(1) | 1 |
| O46 | 0.63295(21)  | 0.20963(34)  | -0.39318(38) | 0.012(1) | 1 |
| O47 | 0.46035(30)  | -0.00299(18) | -0.20561(40) | 0.012(1) | 1 |
| O48 | 0.64615(33)  | -0.00177(20) | -0.21152(44) | 0.012(1) | 1 |

**Table 4SI:** fractional atomic coordinates of ZSM-5 framework's atoms loaded with MTBE and TOL mixture at Room Temperature (°C)

| ZSM-5-MTBE-TOL -30°C |              |             |              |          |          |
|----------------------|--------------|-------------|--------------|----------|----------|
|                      | x/a          | y/b         | z/c          | Uiso     | Fraction |
| T1                   | 0.05368(24)  | 0.42216(21) | -0.32790(39) | 0.003(1) | 1        |
| T2                   | 0.03334(26)  | 0.31657(25) | -0.16674(38) | 0.003(1) | 1        |
| T3                   | 0.06515(22)  | 0.28088(24) | 0.04645(44)  | 0.003(1) | 1        |
| T4                   | 0.06344(22)  | 0.12511(24) | 0.03500(37)  | 0.003(1) | 1        |
| T5                   | 0.02850(23)  | 0.07306(26) | -0.17391(39) | 0.003(1) | 1        |
| T6                   | 0.05741(21)  | 0.19488(25) | -0.30799(32) | 0.003(1) | 1        |
| T7                   | -0.17122(23) | 0.42565(22) | -0.32420(39) | 0.003(1) | 1        |
| T8                   | -0.12417(25) | 0.31132(25) | -0.17770(40) | 0.003(1) | 1        |
| T9                   | -0.17593(24) | 0.27046(25) | 0.03146(40)  | 0.003(1) | 1        |
| T10                  | -0.17898(23) | 0.11443(22) | 0.03097(34)  | 0.003(1) | 1        |
| T11                  | -0.12905(24) | 0.06660(24) | -0.17554(37) | 0.003(1) | 1        |
| T12                  | -0.16406(24) | 0.18832(24) | -0.31122(37) | 0.003(1) | 1        |
| T13                  | 0.44213(22)  | 0.42439(23) | -0.33275(35) | 0.003(1) | 1        |
| T14                  | 0.47133(18)  | 0.31004(24) | -0.18197(34) | 0.003(1) | 1        |
| T15                  | 0.43779(16)  | 0.27995(22) | 0.03492(26)  | 0.003(1) | 1        |
| T16                  | 0.43281(25)  | 0.12352(22) | 0.03065(38)  | 0.003(1) | 1        |
| T17                  | 0.47316(25)  | 0.07360(24) | -0.18441(40) | 0.003(1) | 1        |
| T18                  | 0.44054(23)  | 0.18840(22) | -0.31947(39) | 0.003(1) | 1        |
| T19                  | 0.67239(21)  | 0.42101(24) | -0.31272(38) | 0.003(1) | 1        |
| T20                  | 0.63199(23)  | 0.31032(25) | -0.16755(35) | 0.003(1) | 1        |
| T21                  | 0.66988(25)  | 0.27305(27) | 0.04793(42)  | 0.003(1) | 1        |
| T22                  | 0.67036(21)  | 0.11739(24) | 0.03381(41)  | 0.003(1) | 1        |
| T23                  | 0.63057(26)  | 0.07311(27) | -0.18546(37) | 0.003(1) | 1        |
| T24                  | 0.68043(26)  | 0.19322(25) | -0.30066(34) | 0.003(1) | 1        |
| O1                   | 0.06233(39)  | 0.37651(33) | -0.23136(56) | 0.005(1) | 1        |
| O2                   | 0.06708(33)  | 0.31866(31) | -0.05823(32) | 0.005(1) | 1        |
| O3                   | 0.05312(39)  | 0.20357(19) | 0.02716(76)  | 0.005(1) | 1        |
| O4                   | 0.06768(32)  | 0.09398(42) | -0.07435(36) | 0.005(1) | 1        |
| O5                   | 0.04793(41)  | 0.12223(24) | -0.26256(46) | 0.005(1) | 1        |
| O6                   | 0.05116(37)  | 0.24815(30) | -0.22018(45) | 0.005(1) | 1        |
| O7                   | -0.15472(44) | 0.37221(34) | -0.23950(55) | 0.005(1) | 1        |
| O8                   | -0.16216(38) | 0.30449(33) | -0.07408(50) | 0.005(1) | 1        |
| O9                   | -0.16508(39) | 0.19211(19) | 0.02194(61)  | 0.005(1) | 1        |
| O10                  | -0.16901(29) | 0.07971(39) | -0.07495(32) | 0.005(1) | 1        |
| O11                  | -0.15393(43) | 0.11758(28) | -0.25945(49) | 0.005(1) | 1        |
| O12                  | -0.13280(37) | 0.24465(33) | -0.24096(60) | 0.005(1) | 1        |
| O13                  | -0.04599(21) | 0.32405(35) | -0.15719(69) | 0.005(1) | 1        |
| O14                  | -0.05049(19) | 0.07672(42) | -0.15553(70) | 0.005(1) | 1        |
| O15                  | 0.12074(25)  | 0.41955(36) | -0.39180(52) | 0.005(1) | 1        |
| O16                  | -0.00752(29) | 0.39548(37) | -0.39430(65) | 0.005(1) | 1        |



|     |              |              |              |          |   |
|-----|--------------|--------------|--------------|----------|---|
| O17 | -0.13617(27) | 0.40420(39)  | -0.42600(48) | 0.005(1) | 1 |
| O18 | 0.12970(22)  | 0.20031(46)  | -0.35769(38) | 0.005(1) | 1 |
| O19 | 0.00052(26)  | 0.20846(34)  | -0.39002(43) | 0.005(1) | 1 |
| O20 | -0.12762(25) | 0.18888(41)  | -0.41676(42) | 0.005(1) | 1 |
| O21 | 0.04865(37)  | -0.00091(22) | -0.20480(42) | 0.005(1) | 1 |
| O22 | -0.14228(39) | -0.00759(21) | -0.21338(52) | 0.005(1) | 1 |
| O23 | -0.25055(17) | 0.42913(40)  | -0.34213(48) | 0.005(1) | 1 |
| O24 | -0.24219(20) | 0.20229(33)  | -0.32741(26) | 0.005(1) | 1 |
| O25 | -0.25141(20) | 0.28532(44)  | 0.06417(56)  | 0.005(1) | 1 |
| O26 | -0.25406(17) | 0.10265(28)  | 0.06769(28)  | 0.005(1) | 1 |
| O27 | 0.44365(37)  | 0.37485(30)  | -0.23985(47) | 0.005(1) | 1 |
| O28 | 0.45393(29)  | 0.31534(27)  | -0.06809(26) | 0.005(1) | 1 |
| O29 | 0.42823(39)  | 0.20220(18)  | 0.01903(42)  | 0.005(1) | 1 |
| O30 | 0.44620(49)  | 0.09111(41)  | -0.07592(48) | 0.005(1) | 1 |
| O31 | 0.43502(33)  | 0.11779(24)  | -0.26589(65) | 0.005(1) | 1 |
| O32 | 0.44674(35)  | 0.24536(30)  | -0.23680(43) | 0.005(1) | 1 |
| O33 | 0.66694(29)  | 0.37309(31)  | -0.21820(48) | 0.005(1) | 1 |
| O34 | 0.64498(42)  | 0.31145(28)  | -0.04993(29) | 0.005(1) | 1 |
| O35 | 0.65645(37)  | 0.19527(21)  | 0.03533(82)  | 0.005(1) | 1 |
| O36 | 0.65889(37)  | 0.08964(51)  | -0.07658(38) | 0.005(1) | 1 |
| O37 | 0.66762(42)  | 0.11866(25)  | -0.26535(54) | 0.005(1) | 1 |
| O38 | 0.66190(39)  | 0.24345(31)  | -0.21300(37) | 0.005(1) | 1 |
| O39 | 0.55314(16)  | 0.31296(44)  | -0.19040(63) | 0.005(1) | 1 |
| O40 | 0.55188(21)  | 0.08805(37)  | -0.18923(68) | 0.005(1) | 1 |
| O41 | 0.37150(14)  | 0.41753(28)  | -0.38924(29) | 0.005(1) | 1 |
| O42 | 0.50130(21)  | 0.40645(41)  | -0.40748(52) | 0.005(1) | 1 |
| O43 | 0.63130(24)  | 0.39013(37)  | -0.40462(44) | 0.005(1) | 1 |
| O44 | 0.37512(27)  | 0.20059(40)  | -0.38686(58) | 0.005(1) | 1 |
| O45 | 0.50568(26)  | 0.18985(35)  | -0.38797(50) | 0.005(1) | 1 |
| O46 | 0.63524(18)  | 0.20879(40)  | -0.39676(32) | 0.005(1) | 1 |
| O47 | 0.46021(33)  | -0.00329(17) | -0.20654(50) | 0.005(1) | 1 |
| O48 | 0.64387(38)  | -0.00331(22) | -0.20994(61) | 0.005(1) | 1 |

**Table 5S1:** extraframework coordinates of ZSM-5 loaded with DCE, TOL and MTBE as single molecules and mixture of them at Room Temperature (°C)

| ZSM-5-DCE-30 (*)           |            |            |             |           |          |
|----------------------------|------------|------------|-------------|-----------|----------|
|                            | x/a        | y/b        | z/c         | UIISO     | Fraction |
| DCE1 site                  |            |            |             |           |          |
| C1                         | 0.772(1)   | 0.468(8)   | 0.060(5)    | 0.11(2)   | 0.85(1)  |
| C11                        | 0.686(1)   | 0.470(3)   | 0.069(2)    | 0.11(2)   | 0.85(1)  |
| C12                        | 0.893(1)   | 0.484(2)   | -0.029(2)   | 0.11(2)   | 0.85(1)  |
| C2                         | 0.807(1)   | 0.487(8)   | -0.020(5)   | 0.11(2)   | 0.85(1)  |
| DCE2 site                  |            |            |             |           |          |
| C3                         | 0.748(8)   | 0.796(1)   | 0.170(2)    | 0.15(2)   | 0.76(1)  |
| C13                        | 0.739(2)   | 0.720(1)   | 0.115(2)    | 0.15(2)   | 0.76(1)  |
| C4                         | 0.747(9)   | 0.855(1)   | 0.121(2)    | 0.15(2)   | 0.76(1)  |
| C14                        | 0.75(3)    | 0.931(1)   | 0.177(2)    | 0.15(2)   | 0.76(1)  |
| (*) Martucci et al. 2015   |            |            |             |           |          |
| ZSM-5-TOL-30 (**)          |            |            |             |           |          |
|                            | x/a        | y/b        | z/c         | UIISO     | Fraction |
| TOL1 site                  |            |            |             |           |          |
| C1                         | 0.7491(36) | 0.5795(28) | 0.0559(75)  | 16.1(17)  | 0.86(1)  |
| C2                         | 0.3020(27) | 0.4599(39) | -0.0152(83) | 16.1(17)  | 0.86(1)  |
| C3                         | 0.8113(31) | 0.5512(26) | 0.0733(53)  | 16.1(17)  | 0.86(1)  |
| C4                         | 0.8270(23) | 0.4906(22) | 0.0315(41)  | 16.1(17)  | 0.86(1)  |
| C5                         | 0.7170(30) | 0.4849(40) | -0.0412(70) | 16.1(17)  | 0.86(1)  |
| C6                         | 0.2213(34) | 0.5441(26) | 0.0213(56)  | 16.1(17)  | 0.86(1)  |
| C7                         | 0.8884(28) | 0.4625(46) | 0.0496(41)  | 16.1(17)  | 0.86(1)  |
| TOL2 site                  |            |            |             |           |          |
| C8                         | 0.2339(16) | 0.1859(21) | 0.8186(28)  | 21.8(24)  | 0.64(1)  |
| C9                         | 0.2339(16) | 0.1270(21) | 0.7645(28)  | 21.8(24)  | 0.64(1)  |
| C10                        | 0.2339(16) | 0.1219(21) | 0.9693(28)  | 21.8(24)  | 0.64(1)  |
| C11                        | 0.2339(16) | 0.1829(21) | 0.9209(28)  | 21.8(24)  | 0.64(1)  |
| C12                        | 0.2339(16) | 0.0660(21) | 0.9150(28)  | 21.8(24)  | 0.64(1)  |
| C13                        | 0.2339(16) | 0.0660(21) | 0.8131(28)  | 21.8(24)  | 0.64(1)  |
| C14                        | 0.2339(16) | 0.0098(21) | 0.7604(28)  | 21.8(24)  | 0.64(1)  |
| (**) Rodeghero et al. 2015 |            |            |             |           |          |
| ZSM-5-MTBE-30 (***)        |            |            |             |           |          |
|                            | x/a        | y/b        | z/c         | UIISO     | Fraction |
| MTBE1 site                 |            |            |             |           |          |
| C1M                        | 0.7413 (1) | 0.5649(1)  | 0.1387 (1)  | 0.195(23) | 1.00(1)  |
| C2M                        | 0.7567(1)  | 0.4946 (1) | 0.1307 (1)  | 0.195(23) | 1.00(1)) |
| C3M                        | 0.1765 (1) | 0.5163 (1) | -0.0915 (1) | 0.195(23) | 1.00(1)  |
| OMM-M                      | 0.7051 (1) | 0.4680(1)  | 0.0647 (1)  | 0.195(23) | 1.00(1)  |
| C4M                        | 0.7473 (1) | 0.4604 (1) | 0.2250(1)   | 0.195(23) | 1.00(1)  |
| C5M                        | 0.6839 (1) | 0.5074 (1) | -0.0157(5)  | 0.195(23) | 1.00(1)  |
| MTBE2 site                 |            |            |             |           |          |
| C1aM                       | 0.7425(1)  | 0.7197 (1) | 0.0723(1)   | 0.123(4)  | 0.92(1)  |
| C2aM                       | 0.7471(1)  | 0.6937 (1) | 0.1733 (1)  | 0.123(4)  | 0.92(1)  |
| c3a                        | 0.7692(1)  | 0.6740 (1) | 0.0002 (1)  | 0.123(4)  | 0.92(1)  |
| C4aM                       | 0.7734(1)  | 0.7850(1)  | 0.06569(1)  | 0.123(4)  | 0.92(1)  |

| O5aM                  | 0.6695(1)  | 0.7210(1)  | 0.0520(1)  | 0.123(4) | 0.92(1)  |
|-----------------------|------------|------------|------------|----------|----------|
| C6aM                  | 0.6211(1)  | 0.75641(1) | 0.1131(1)  | 0.123(4) | 0.92(1)  |
| (*** In this work     |            |            |            |          |          |
| ZSM-5- DCE-MTBE -30°C |            |            |            |          |          |
|                       | x/a        | y/b        | z/c        | UIISO    | Fraction |
| MTBE1 site            |            |            |            |          |          |
| C1                    | 0.7392 (4) | 0.5740(2)  | 0.0598(1)  | 0.071(1) | 0.81(1)  |
| C2                    | 0.7310(3)  | 0.5042(2)  | 0.0837(1)  | 0.071(1) | 0.81(1)  |
| C3                    | 0.2188 (3) | 0.5365(3)  | -0.035(8)  | 0.071(1) | 0.81(1)  |
| OMM                   | 0.6636(3)  | 0.4878(3)  | 0.0496(1)  | 0.071(1) | 0.81(1)  |
| C4                    | 0.7303(6)  | 0.4931(5)  | 0.1907(1)  | 0.071(1) | 0.81(1)  |
| C5                    | 0.6406(4)  | 0.5172(5)  | -0.038(7)  | 0.071(1) | 0.81(1)  |
| DCE2 site             |            |            |            |          |          |
| DCE-CI                | 0.7455(20) | 0.6895(7)  | 0.1577(18) | 0.087(1) | 0.68(1)  |
| DCE-C1                | 0.7618(16) | 0.7682(9)  | 0.1168(18) | 0.087(1) | 0.68(1)  |
| DCE-C2                | 0.7418(16) | 0.8225(7)  | 0.1657(14) | 0.087(1) | 0.68(1)  |
| DCE-CI2               | 0.7583(16) | 0.9012(9)  | 0.1252(21) | 0.087(1) | 0.68(1)  |
| ZSM-5- TOL-MTBE -30°C |            |            |            |          |          |
|                       | x/a        | y/b        | z/c        | UIISO    | Fraction |
| TOL1 site             |            |            |            |          |          |
| M7                    | 0.7776(1)  | 0.8978(1)  | 0.1843(5)  | 0.160(1) | 0.94(1)  |
| M1                    | 0.2175(1)  | 0.0447(3)  | 0.6601(3)  | 0.160(1) | 0.94(1)  |
| M2                    | 0.2175(1)  | -0.0140(3) | 0.6078(3)  | 0.160(1) | 0.94(1)  |
| M3                    | 0.2175(1)  | -0.0162(3) | 0.8130(3)  | 0.160(1) | 0.94(1)  |
| M4                    | 0.2175(1)  | 0.0447(3)  | 0.76319(3) | 0.160(1) | 0.94(1)  |
| M5                    | 0.2175(1)  | -0.0744(3) | 0.76319(3) | 0.160(1) | 0.94(1)  |
| M6                    | 0.2175(1)  | -0.0744(3) | 0.6578(3)  | 0.160(1) | 0.94(1)  |
| MTBE2 site            |            |            |            |          |          |
| C1a                   | 0.7434(2)  | 0.7227(2)  | 0.7227(3)  | 0.088(5) | 0.84(10) |
| C2a                   | 0.7227(3)  | 0.7057(6)  | 0.1696(3)  | 0.088(5) | 0.84(10) |
| c3a                   | 0.7701(2)  | 0.6727(4)  | -0.0002(3) | 0.088(5) | 0.84(10) |
| C4a                   | 0.7696(3)  | 0.7696(2)  | 0.0437(8)  | 0.088(5) | 0.84(10) |
| O5a                   | 0.6698(3)  | 0.7186(1)  | 0.0512(1)  | 0.088(5) | 0.84(10) |
| C6a                   | 0.6221(1)  | 0.6221(2)  | 0.1129(2)  | 0.088(5) | 0.84(10) |
